# Supplementary material for: miR-17-5p and miR-19b-3p prevent osteoarthritis progression by targeting EZH2
Source: PubMed Central journal article supplement — Exp Ther Med. 2020 Jun 12;20(2):1653–63. doi: 10.3892/etm.2020.8887 (PMC7388554; doi:10.3892/etm.2020.8887), 2020-06-12

Figure S1. Efficiency of transfection determined by reverse transcription-quantitative PCR. (A-C) Chondrocytes were transfected with (A) miR-17-5p mimic, in-miR-17-5p, (B) miR-19b-3p mimic, in-miR-19b-3p, (C) EZH2 overexpression vector and si-EZH2. \*P<0.05. miR, microRNA; in, inhibitor; si, small interfering RNA; EZH2, enhancer of zeste homolog 2.

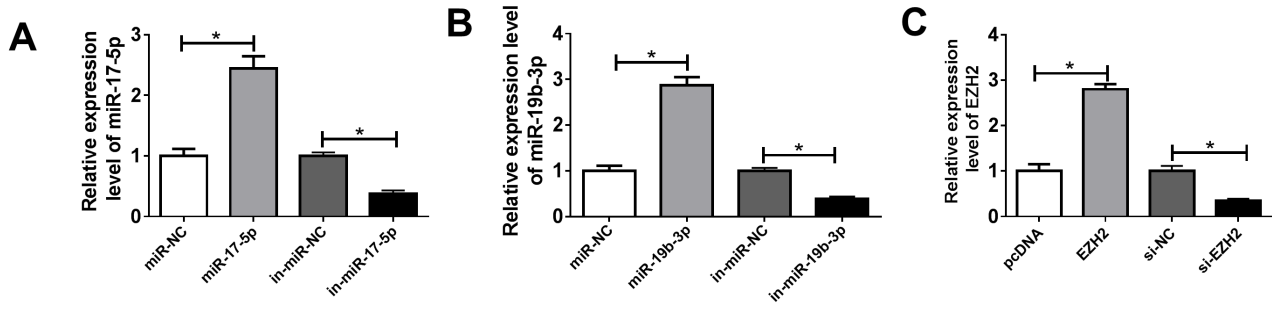

Supplement: Supplementary_Data.pdf [file Supplementary_Data.pdf]
